# Supplementary material for: Biosurfactant from vaginal Lactobacillus crispatus BC1 as a promising agent to interfere with Candida adhesion
Source: Springer Nature journal article supplement (doi:10.1186/s12934-020-01390-5), 2020-06-18

**a**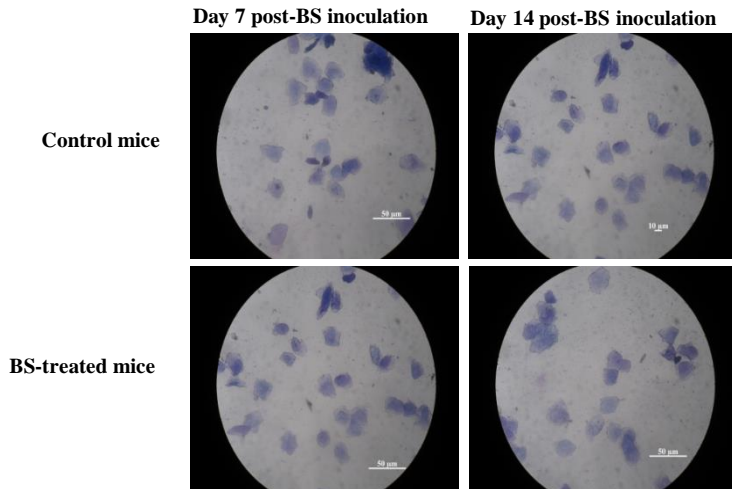**b**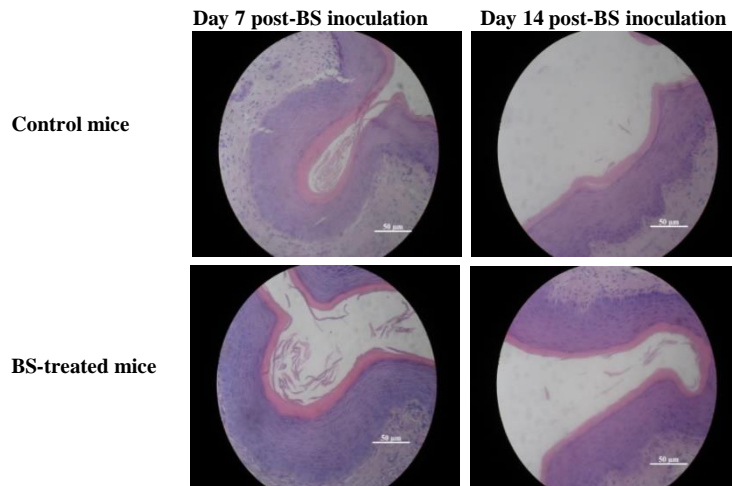**c**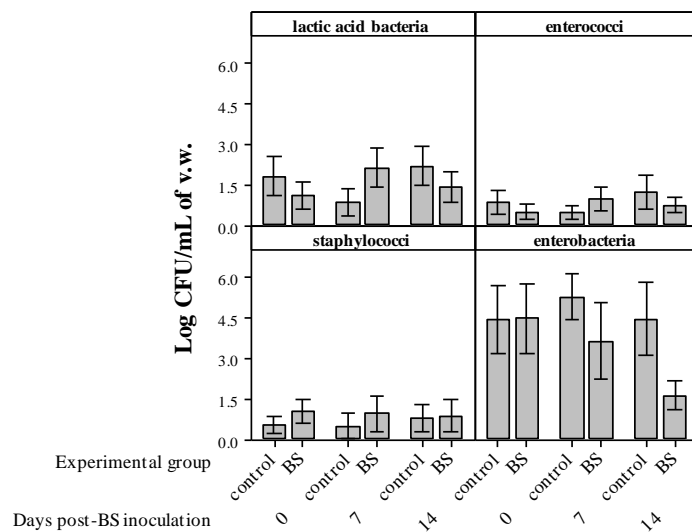

Supplement: MOESM1 [file 12934_2020_1390_MOESM1_ESM.pdf]
